# Supplementary material
Source: publisher figshare collection journal article supplement (https://karger.figshare.com/ndownloader/files/26504108)
Supplement: Supplementary file 1 [file 26504108]

**Table S3. Associations of TMAO and adjusted variables with all-cause and CV mortality in male PD patients from Cox regression models.**

|  |  | **All-cause mortality** |  |  | **CV mortality** |  |
| --- | --- | --- | --- | --- | --- | --- |
|  |  | **HR (95% CI)** | ***P*** |  | **HR (95% CI)** | ***P*** |
| **ln (TMAO)** |  | 1.30 (1.02-1.65) | 0.037 |  | 1.40 (1.01-1.93) | 0.042 |
| **Age (per 1 year)** |  | 1.05 (1.03-1.07) | < 0.001 |  | 1.06 (1.03-1.08) | <0.001 |
| **Diabetes (yes vs no)** |  | 1.29 (0.84-1.98) | 0.247 |  | 1.26 (0.72-2.21) | 0.425 |
| **CVD (yes vs no))** |  | 1.57 (1.05-2.36) | 0.030 |  | 1.87 (1.10-3.19) | 0.021 |
| **BMI (per 1 kg/m2)** |  | 1.05 (0.98-1.12) | 0.209 |  | 1.01 (0.93-1.11) | 0.764 |
| **MAP (per 1 mmHg)** |  | 0.99 (0.98-1.01) | 0.365 |  | 1.00 (0.98-1.02) | 0.912 |
| **albumin (per 1 g/L)** |  | 0.93 (0.89-0.97) | 0.001 |  | 0.93 (0.88-0.98) | 0.009 |
| **TG (per 1 mmol/L)** |  | 1.14 (1.00-1.30) | 0.054 |  | 1.21 (1.04-1.42) | 0.014 |
| **LDL-C (per 1mmol/L)** |  | 0.91 (0.79-1.04) | 0.150 |  | 0.90 (0.76-1.08) | 0.255 |
| **hs-CRP (per 1 mg/L)** |  | 1.00 (0.99-1.01) | 0.876 |  | 1.00 (0.95-1.04) | 0.813 |
| **rGFR (per 1ml/min/1.73 m2)** |  | 0.97 (0.89-1.05) | 0.405 |  | 0.98 (0.87-1.09) | 0.670 |
| **total Kt/V** |  | 1.01 (0.72-1.42) | 0.950 |  | 0.91 (0.57-1.44) | 0.684 |

Modeled as natural log transformed TMAO. TMAO, trimethylamine N-oxide; CV, cardiovascular; IR, incidence rate; PY, person years; HR, hazard ratios; SHR, subdistribution hazard ratio; 95% CI, 95% confidence interval.

aThe model was adjusted for age, sex, diabetes, history of CVD, BMI, MAP, albumin, LDL-C, TG, hs-CRP, rGFR and total Kt/V.

*P* < 0.05 is considered statistically significant.
